# Supplementary material
Source: PubMed Central journal article supplement (PMC8500843)
Supplement: mmc1.pdf [file mmc1.pdf]

Table S1: Titer, Total Virus Particles and Ratio of Defective Particles:Infectious Virions of HCoV-OC43 propagated in HRT-18, MRC-5 and Vero E6 cells.

| <b>Cell Line</b> | <b>Day</b> | <b>Log<sub>10</sub> TCID<sub>50</sub>/ml</b> | <b>Std. Error</b> | <b>Virus particles/ml</b> | <b>Std. Error</b> | <b>Total Particles</b> | <b>Infectious Particles</b> | <b>Defective Particles</b> | <b>Defective particles: Infections virions</b> |
|------------------|------------|----------------------------------------------|-------------------|---------------------------|-------------------|------------------------|-----------------------------|----------------------------|------------------------------------------------|
| HRT-18           | 1          | 5.15                                         | 0.07              | 6.77                      | 0.07              | 5.89E+06               | 1.40E+05                    | 5.75E+06                   | 41.1                                           |
| HRT-18           | 2          | 5.59                                         | 0.13              | 7.18                      | 0.21              | 1.51E+07               | 3.90E+05                    | 1.47E+07                   | 37.8                                           |
| HRT-18           | 3          | 5.86                                         | 0.28              | 7.87                      | 0.04              | 7.41E+07               | 7.21E+05                    | 7.34E+07                   | 101.7                                          |
| HRT-18           | 4          | 5.69                                         | 0.07              | 8.21                      | 0.01              | 1.62E+08               | 4.91E+05                    | 1.62E+08                   | 329.4                                          |
| HRT-18           | 5          | 6.40                                         | 0.39              | 8.37                      | 0.03              | 2.34E+08               | 2.50E+06                    | 2.32E+08                   | 92.9                                           |
| HRT-18           | 6          | 6.47                                         | 0.10              | 8.37                      | 0.05              | 2.34E+08               | 2.98E+06                    | 2.31E+08                   | 77.6                                           |
| HRT-18           | 7          | 6.48                                         | 0.20              | 8.46                      | 0.05              | 2.88E+08               | 3.03E+06                    | 2.85E+08                   | 94.3                                           |
| <b>Cell Line</b> | <b>Day</b> | <b>Log<sub>10</sub> PFU/ml</b>               | <b>Std. Error</b> | <b>Virus particles/ml</b> | <b>Std. Error</b> | <b>Total Particles</b> | <b>Infectious Particles</b> | <b>Defective Particles</b> | <b>Defective particles: Infections virions</b> |
| MRC-5            | 1          | 6.75                                         | 0.08              | 6.59                      | 0.02              | 3.86E+06               | 5.67E+06                    | -1.81E+06                  | N/A*                                           |
| MRC-5            | 2          | 6.92                                         | 0.07              | 7.45                      | 0.07              | 2.80E+07               | 8.25E+06                    | 1.98E+07                   | 2.4                                            |
| MRC-5            | 3          | 6.89                                         | 0.08              | 7.24                      | 0.07              | 1.73E+07               | 7.76E+06                    | 9.50E+06                   | 1.2                                            |
| MRC-5            | 4          | 7.02                                         | 0.07              | 7.18                      | 0.08              | 1.51E+07               | 1.04E+07                    | 4.69E+06                   | 0.5                                            |
| MRC-5            | 5          | 6.59                                         | 0.15              | 7.17                      | 0.03              | 1.49E+07               | 3.86E+06                    | 1.10E+07                   | 2.9                                            |
| MRC-5            | 6          | 6.51                                         | 0.06              | 7.09                      | 0.01              | 1.23E+07               | 3.26E+06                    | 9.06E+06                   | 2.8                                            |
| MRC-5            | 7          | 6.07                                         | 0.03              | 7.43                      | 0.12              | 2.71E+07               | 1.17E+06                    | 2.59E+07                   | 22.1                                           |
| <b>Cell Line</b> | <b>Day</b> | <b>Log<sub>10</sub> TCID<sub>50</sub>/ml</b> | <b>Std. Error</b> | <b>Virus particles/ml</b> | <b>Std. Error</b> | <b>Total Particles</b> | <b>Infectious Particles</b> | <b>Defective Particles</b> | <b>Defective particles: Infections virions</b> |
| Vero E6          | 1          | 4.83                                         | 0.22              | N/A                       | N/A               | N/A                    | N/A                         | N/A                        | N/A                                            |
| Vero E6          | 2          | 5.38                                         | 0.12              | N/A                       | N/A               | N/A                    | N/A                         | N/A                        | N/A                                            |
| Vero E6          | 3          | 5.67                                         | 0.07              | N/A                       | N/A               | N/A                    | N/A                         | N/A                        | N/A                                            |
| Vero E6          | 4          | 6.55                                         | 0.04              | 6.95                      | 0.38              | 8.93E+06               | 3.55E+06                    | 5.39E+06                   | 1.5                                            |
| Vero E6          | 5          | 6.71                                         | 0.21              | 7.65                      | 0.33              | 4.44E+07               | 5.10E+06                    | 3.93E+07                   | 7.7                                            |
| Vero E6          | 6          | 6.47                                         | 0.04              | 8.14                      | 0.18              | 1.39E+08               | 2.97E+06                    | 1.36E+08                   | 46.0                                           |
| Vero E6          | 7          | 6.51                                         | 0.13              | 8.51                      | 0.10              | 3.21E+08               | 3.25E+06                    | 3.18E+08                   | 97.9                                           |

\* Value not able to be determined because Virus Particles/ml were less than PFU/ml.
